# Supplementary material for: Branched polyethylene mimicry by metathesis copolymerization of fatty acid-based α,ω-dienes
Source: Royal Society of Chemistry journal article supplement (doi:10.1039/c3gc42280a), 2013-12-19
Supplement: c3gc42280a.pdf [file c3gc42280a.pdf]

## Supporting Information

### **Branched polyethylene mimicry by metathesis copolymerization of fatty acid-based $\alpha,\omega$ -dienes.**

Thomas Lebarbé,<sup>a,b,d</sup> Mehdi Neqal,<sup>a,b</sup> Etienne Grau,<sup>a,b</sup> Carine Alfos,<sup>c</sup> and Henri Cramail<sup>a,b,\*</sup>

### **Materials and Instrumentation**

Methyl 10-undecenoate (>98.0%) was supplied by TCI Europe. 1,5,7-triazabicyclo[4.4.0]dec-5-ene (TBD, 98%), Grubbs 1<sup>st</sup> generation metathesis catalyst, ethyl vinyl ether (99%), titanium isopropoxide (99.9%), 1,12-dodecanediol (99%), lithium hydroxide (98%), lithium aluminium hydride (95%), palladium (10%) on charcoal were obtained from Sigma-Aldrich. 12-hydroxy stearic acid (99%) was purchased from Nu-Chek Prep (US).

All NMR experiments were performed at 298 K on a Bruker Avance I NMR spectrometer operating at 400MHz and equipped with a Bruker multinuclear z-gradient direct probe head capable of producing gradients in the z direction with strength 53.5 G.cm<sup>-1</sup>. Size exclusion chromatography (SEC) analyses were performed in THF (40°C) on a PL-GPC 50 plus Integrated GPC from Polymer laboratories-Varian with a series of four columns from TOSOH (TSKgel TOSOH: HXL-L (guard column 6,0mm ID x 4,0cm L); G4000HXL (7,8mm ID x 30,0cm L); G3000HXL (7,8mm ID x 30,0cm L) and G2000HXL (7,8mm ID x 30,0cm L)). The elution of the filtered samples was monitored using simultaneous refractive index and UV detection. The elution times were converted to molar mass using a calibration curve based on low dispersity ( $M_w/M_n$ ) polystyrene (PS) standards. Differential scanning calorimetry (DSC) thermograms were measured using a DSC Q100 apparatus from TA instruments. Polymer samples were first heated from -100°C to 130 °C, subsequently cooled from 130°C to -100°C and then the melting points were calculated from a second heating run. All runs were performed at a rate of 10 °C.min<sup>-1</sup>. Modulated DSC analyses were done from -100°C to

100°C after the sample was kept at 100°C for 3 minutes to erase the thermal history of the polymer. The analysis was performed at a rate of 3°C.min<sup>-1</sup> with a modulation amplitude of 0.64 °C and a modulation period of 60 s. Thermogravimetric analyses (TGA) were performed on TGA-Q50 system from TA instruments at a heating rate of 10 °C.min<sup>-1</sup> under nitrogen atmosphere from RT to 700°C. X-ray diffraction patterns at wide angles (WAXS) were obtained with a microfocus rotating anode X-ray source giving radiation of 1.5418 Å (Rigaku MicroMax-007 HF) combined with performant multi-layers optics and a 3-pinholes collimation that provide an intense X-ray intensity on the sample. The sample, mounted on X-Y stage, was held in a Lindemann capillary and placed in an oven providing a temperature control of 0.1 K. A 2-dimensionnal detector (Image plate from Mar Research) was collecting the scattered radiations. Calibration of the sample-detector distance was performed using silver behenate as a reference.

## Synthesis of monomers

**Linear  $\alpha,\omega$ -diene monomer (L).** Compound (L) was prepared using methyl 10-undecenoate (15 g, 75.6 mmol) as two molar equivalents and 1,12-dodecanediol (7.65g, 37.8 mmol), representing one equivalent in terms of reactive functions. The reaction was catalyzed by Triazabicyclodecene (TBD) using a 5% mol ratio regarding 10-methylundecenoate. The mixture was flushed with nitrogen at 120°C for 6 h. Then, for the last 2 h, the nitrogen flux was substituted for vacuum. The reaction was eventually stopped and the compound was isolated by (recrystallization at 50°C in dichloromethane) and then on silica-gel column eluted with a mixture of cyclohexane/ethyl acetate (80/20). The process resulted in the isolation of compound (L) as a white solid in 61% yield (12.4 g).

**Branched  $\alpha,\omega$ -diene monomer (B).** The 12-hydroxy stearyl alcohol first had to be reduced from its carboxylic acid version, the 12-hydroxy stearic acid. This reaction was carried out using 10 g (33 mmol) of 12-hydroxy stearic acid and 3 molar equivalents of LiAlH<sub>4</sub> (3.79 g,

100 mmol) catalyst. The 12-hydroxy stearic acid was first dissolved in 100 mL of dry THF, and  $\text{LiAlH}_4$  was slowly dissolved in 300 mL. The reaction flask with  $\text{LiAlH}_4$  was put in an ice bath and the dissolved 12-hydroxy stearic acid was slowly added. The mixture was stirred for 16 h under nitrogen, then the ice bath was removed and the mixture was refluxed at  $70^\circ\text{C}$  for 6 h. Distilled water was added to deactivate the remaining hydride followed by 400 mL of 1N HCl. The synthesized compound could not be isolated using a silica-gel column, whatever the solvents or the proportions involved. The 12-hydroxystearic acid was separated from the 12-hydroxystearyl alcohol using Lithium hydroxide in THF. 12-hydroxystearic acid precipitated by forming a complex with the lithium ion whilst on carboxylate form. The 12-hydroxystearyl alcohol is still soluble in THF and can be isolated by simple filtration. Then, compound (**B**) was synthesized by transesterification using 10-methylundecenoate (6.39 g, 32.2 mmol) as 2.5 molar equivalents and 12-hydroxystearyl alcohol (4.37 g, 12.9 mmol) as one molar equivalent. The same conditions were used for the reaction than for compound (**L**) except the catalyst which was substituted by 0.2mol% of titanium isopropoxide. Compound (**B**) was isolated using silica-gel column eluted with a mixture of n-heptane/ethyl acetate (95/5). The process resulted in the isolation of compound (**B**) as a viscous liquid with a 99% purity determined by gas chromatography.

### **Polymerization reactions**

The copolymers were synthesised by ADMET polymerization using monomers (**B**) and (**L**) in various amounts. Each reaction was catalyzed using first generation Grubbs metathesis catalyst at 1mol%. The reaction was carried out at  $85^\circ\text{C}$  for 8h, and vacuum was constantly applied to remove the ethylene formed during the polymerization. The reaction medium was then solubilized in THF and deactivated using ethylvinyl ether.  $^1\text{H-NMR}$  and SEC (in THF) analyses of the resulting polymers showed almost quantitative conversion of the monomers as evidenced by the absence of corresponding peaks (terminal olefins in  $^1\text{H-NMR}$ ) and traces (in SEC). Each polymer was then precipitated in methanol and dried to remove solvent traces.

## Hydrogenation of the polyesters

Unsaturation in between polymer units were hydrogenated by solubilizing each polymer in toluene with a 15 mL ratio for 500 mg of polymer. The Palladium on charcoal catalyst was added with a 50 mg ratio for 500 mg of polymer. The reaction was carried out under 50 bar  $H_2$  at 80°C for 20h. The resulting solution was filtered on Celite to isolate the saturated polymer after removal of the solvent under reduced pressure.

## Additional tables and figures

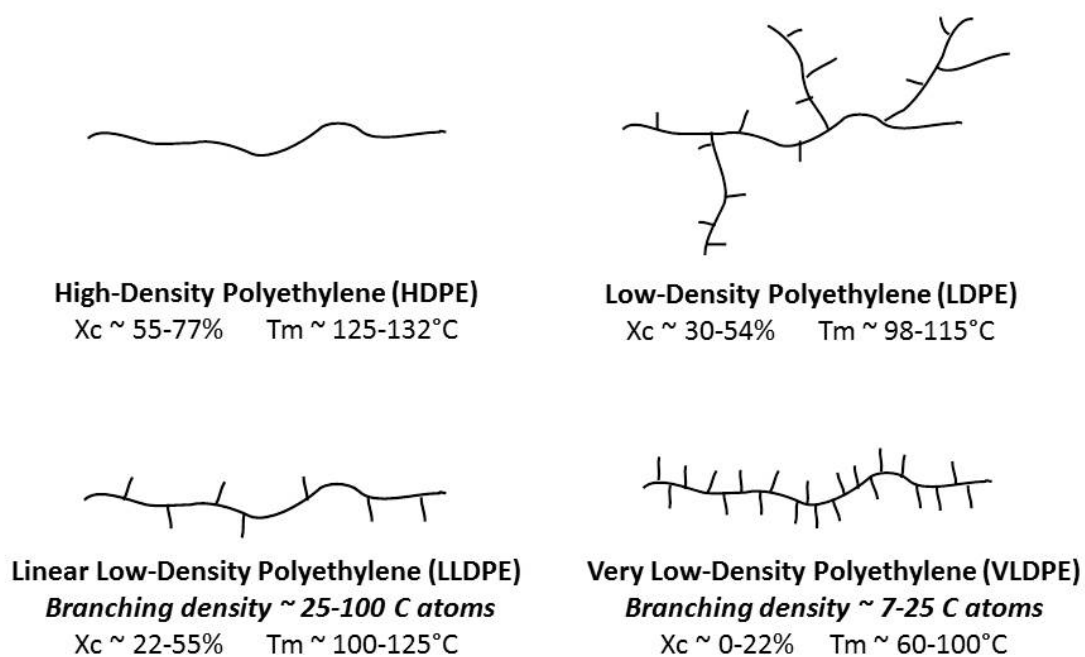

**Figure S1-** Schematic representation of polyethylene classes and corresponding properties

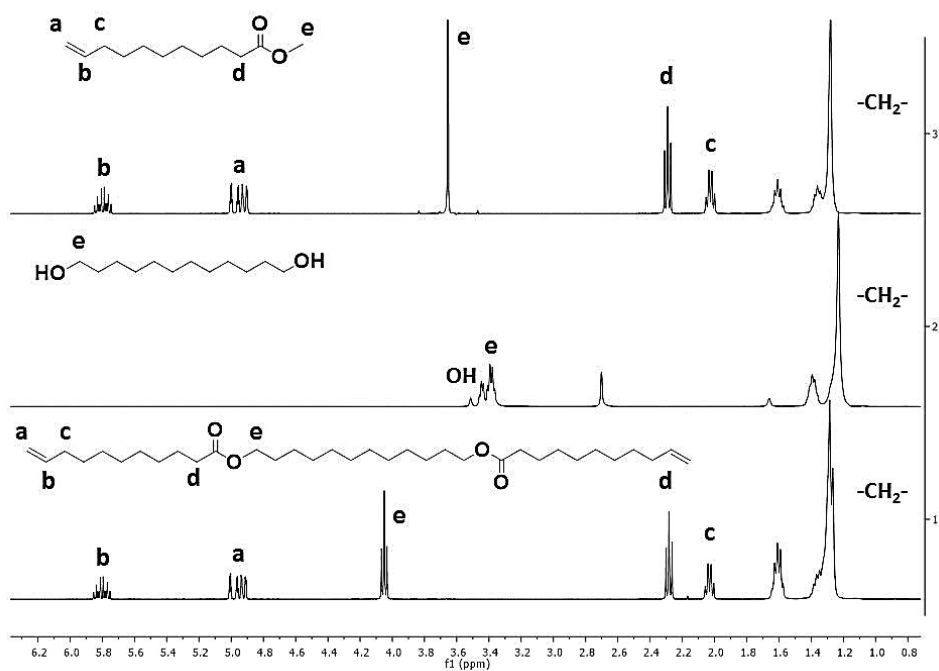

**Figure S2-** <sup>1</sup>H-NMR stacked spectra of methyl 10-undecenoate (CDCl<sub>3</sub>), 1,12-dodecanediol (DMSO-d<sub>6</sub>) and linear α,ω-diene (CDCl<sub>3</sub>).

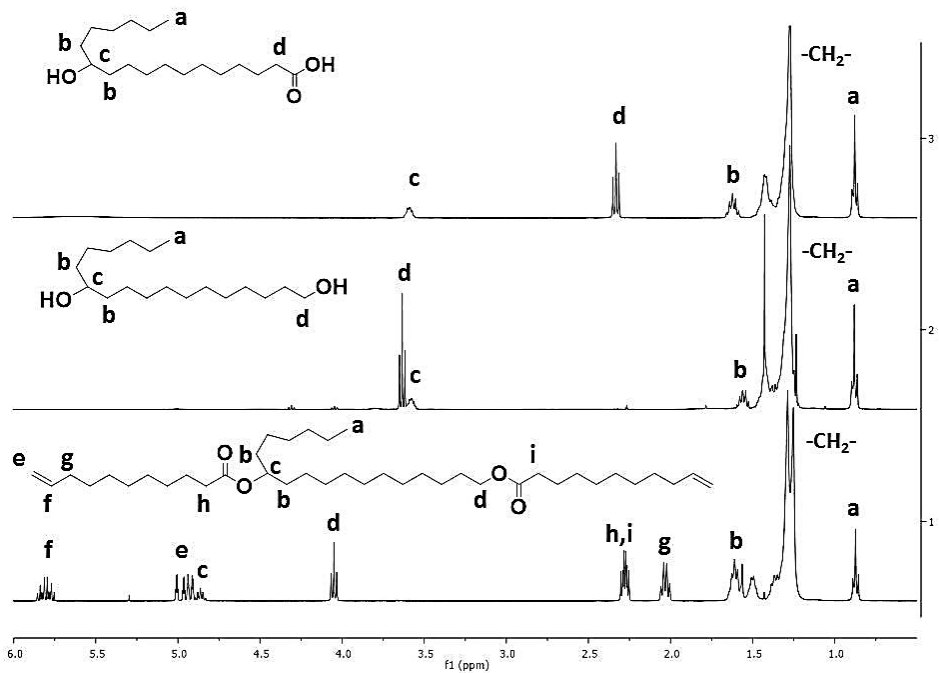

**Figure S3-** <sup>1</sup>H-NMR stacked spectra of 12-hydroxystearic acid, 12-hydroxystearyl alcohol and branched α,ω-diene in CDCl<sub>3</sub>.

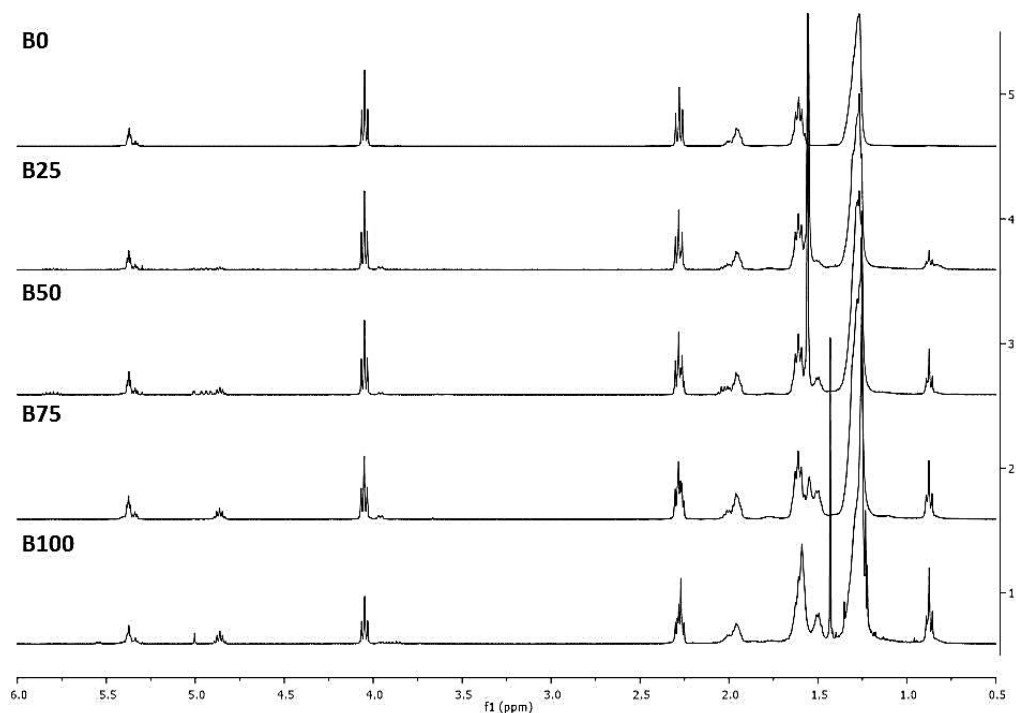

**Figure S4-** <sup>1</sup>H-NMR stacked spectra of the unsaturated polyesters in CDCl<sub>3</sub>.

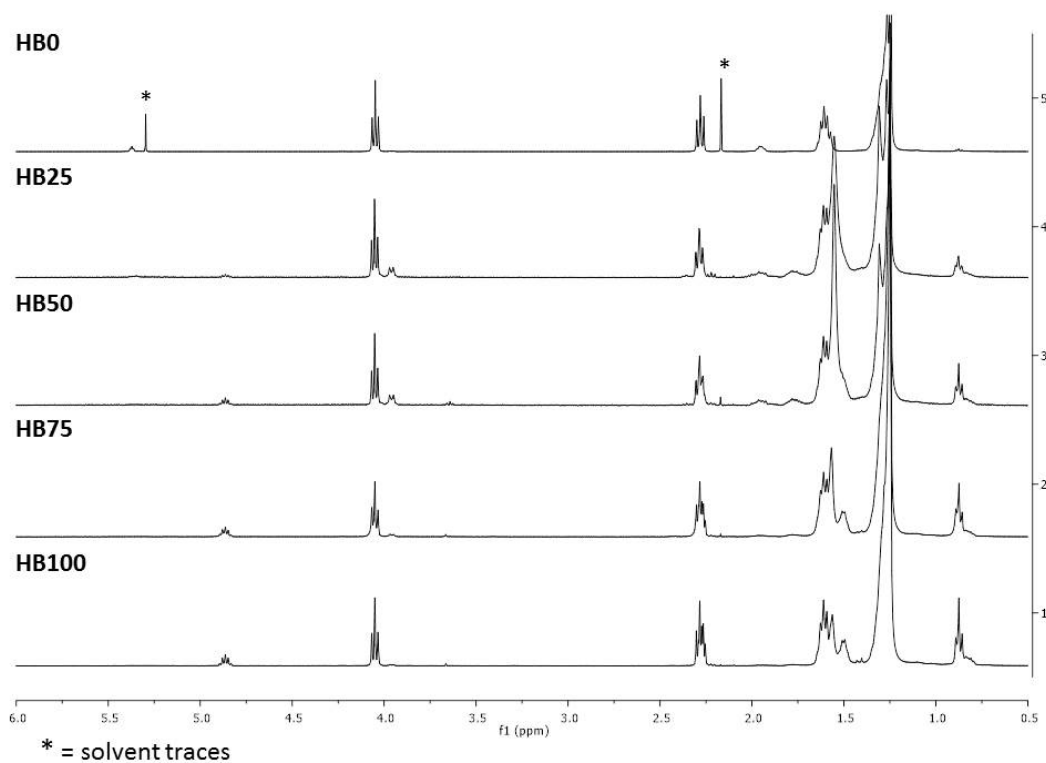

**Figure S5-** <sup>1</sup>H-NMR stacked spectra of the hydrogenated polyesters in CDCl<sub>3</sub>.

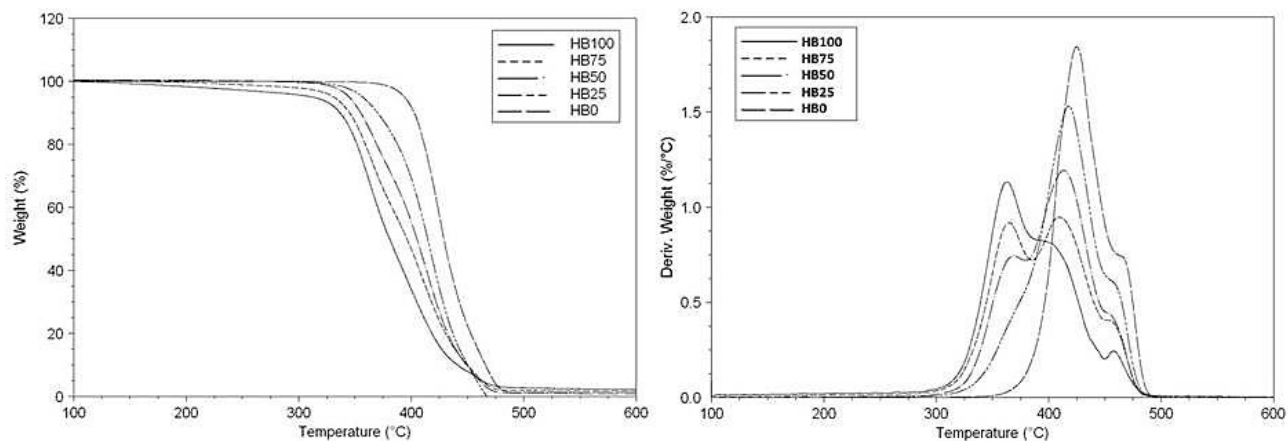

**Figure S6-** TGA curves and derivative curves of the saturated polyesters.  $10^{\circ}\text{C}\cdot\text{min}^{-1}$ .

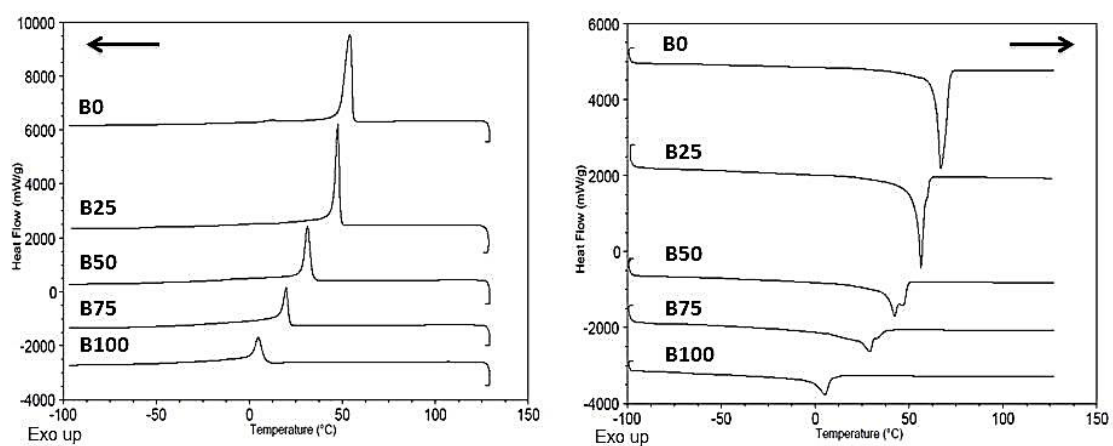

**Figure S7-** DSC cooling and heating curves of the unsaturated polyesters.  $10^{\circ}\text{C}\cdot\text{min}^{-1}$ .

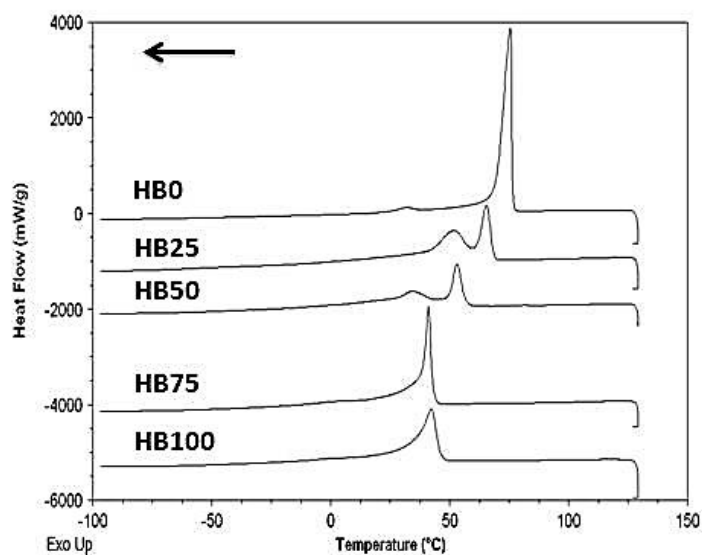

**Figure S8-** DSC cooling curves of the hydrogenated polyesters.  $10^{\circ}\text{C}\cdot\text{min}^{-1}$ .

**Table S1-** Crystallization parameters of the unsaturated and the hydrogenated copolyesters.

| Entry        | mol% (B)[d] <sup>a</sup> | T <sub>c</sub> (°C) <sup>b</sup> | ΔH <sub>c</sub> (J.g <sup>-1</sup> ) <sup>b</sup> |
|--------------|--------------------------|----------------------------------|---------------------------------------------------|
| <b>B0</b>    | 0                        | 54.0                             | 103.3                                             |
| <b>HB0</b>   | 0                        | 75.4                             | 133.3                                             |
| <b>B25</b>   | 22[136]                  | 47.6                             | 88.4                                              |
| <b>HB25</b>  | 22[136]                  | 51.3 – 65.5                      | 92.6                                              |
| <b>B50</b>   | 47[68]                   | 31.2                             | 62.3                                              |
| <b>HB50</b>  | 47[68]                   | 34.1 – 53.2                      | 65.3                                              |
| <b>B75</b>   | 74[45]                   | 19.7                             | 40.1                                              |
| <b>HB75</b>  | 74[45]                   | 41.0                             | 62.9                                              |
| <b>B100</b>  | 100[34]                  | 4.9                              | 32.1                                              |
| <b>HB100</b> | 100[34]                  | 42.2                             | 60.3                                              |

(a)<sup>1</sup>H-NMR- [d] is the branching density (number of atoms of the main chain between two branching points) (b) DSC-10°C.min<sup>-1</sup>

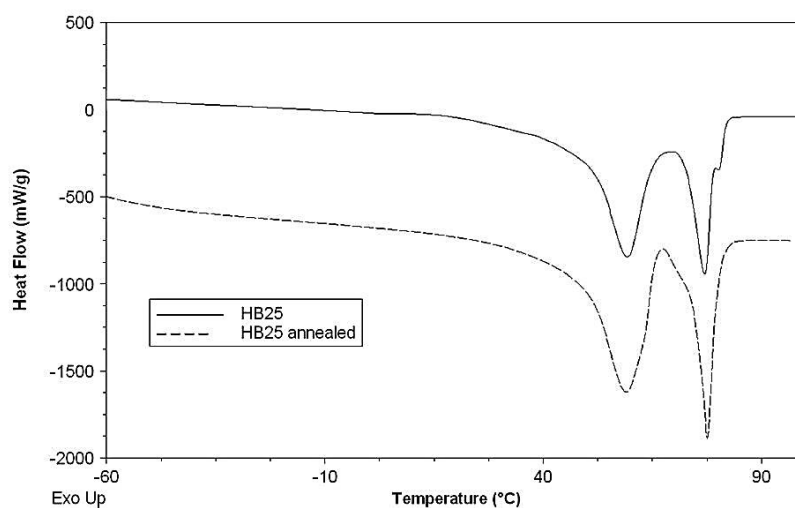

**Figure S9-** DSC heating scan traces of HB25 before and after annealing at 65°C during 15 minutes. 10°C.min<sup>-1</sup>.

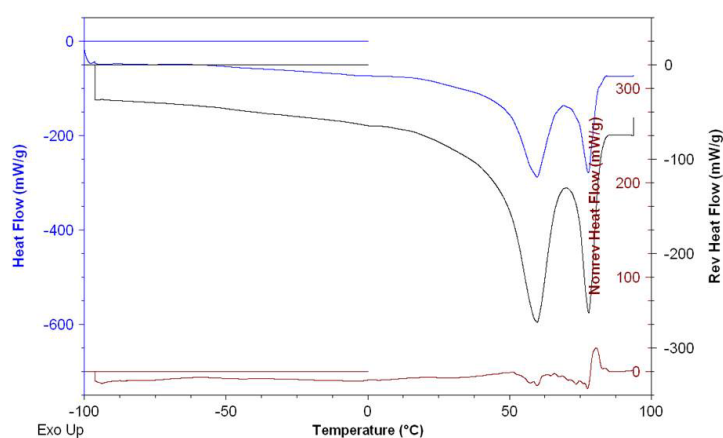

**Figure S10-** Modulated DSC heating scan traces of HB25. 3°C.min<sup>-1</sup>.



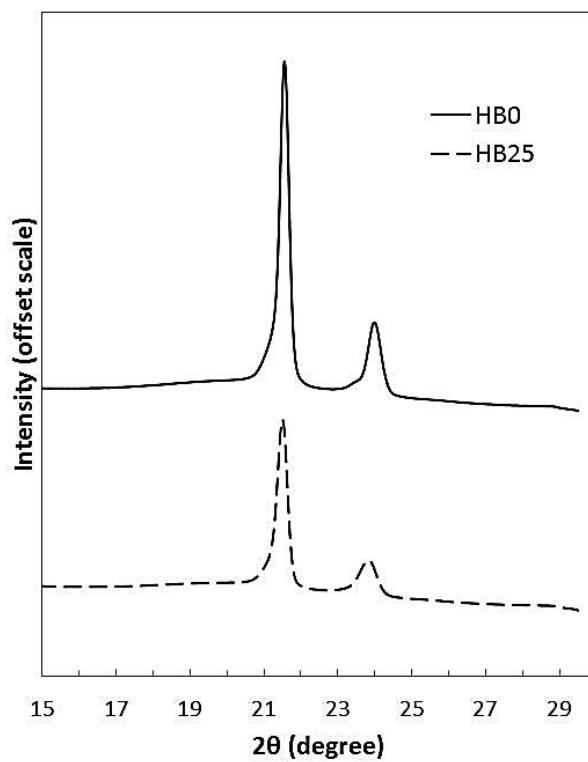

Figure S11- WAXD patterns of HB0 and HB25 obtained at 25°C.

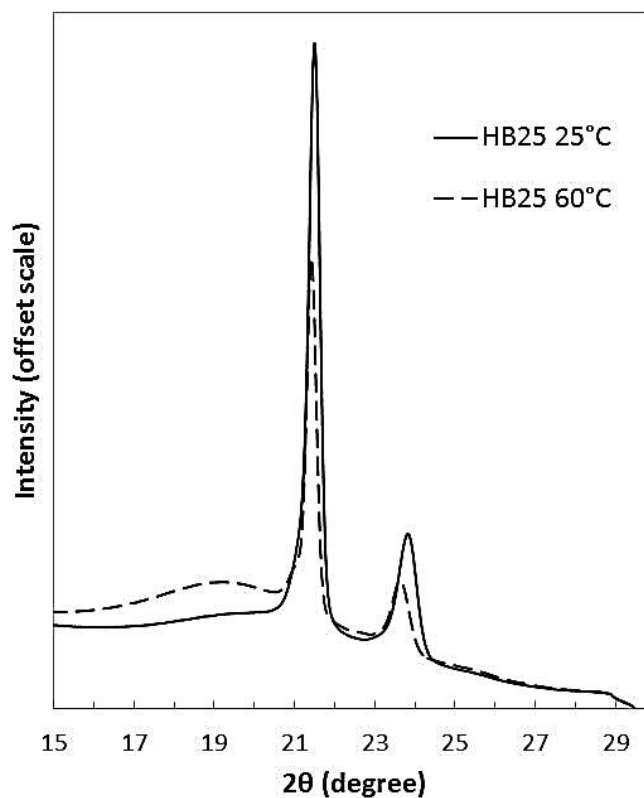

Figure S12- WAXD patterns of HB25 obtained at 25°C and 60°C.

**Table S2-** Scattering angle values and apparent crystallite sizes for HDPE, HB0 and HB25 at different temperatures.

|             | <b>T(°C)</b> | <b>2θ (110) (°)</b> | <b>2θ (200) (°)</b> | <b>apparent<br/>crystallite size<sup>a</sup> (nm)</b> |
|-------------|--------------|---------------------|---------------------|-------------------------------------------------------|
| <b>HDPE</b> | 25           | 21.7                | 24.0                | -                                                     |
| <b>HB0</b>  | 25           | 21.6                | 24.0                | 28.8                                                  |
| <b>HB25</b> | 25           | 21.5                | 23.8                | 27.1                                                  |
| <b>HB25</b> | 60           | 21.4                | 23.7                | 28.8                                                  |

(a) Calculated using Scherrer equation<sup>1</sup> on the (110) reflection peak

1. P. Scherrer, *Göttinger Nachrichten Math. Phys.*, 1918, **2**, 98-100.
